# Supplementary material for: The significant others’ responses to trauma scale (SORTS): applying factor analysis and item response theory to a measure of PTSD symptom accommodation
Source: PubMed Central journal article supplement — Eur J Psychotraumatol. 2024 Jun 5;15(1):2353530. doi: 10.1080/20008066.2024.2353530 (PMC11155430; doi:10.1080/20008066.2024.2353530), 2024-06-05
Supplement: ZEPT_A_2353530_SM8091.pdf [file ZEPT_A_2353530_SM8091.pdf]

Table S1.

*Demographic and Clinical Variables Available across Contributing Datasets*

|                                  | Dataset<br>1 | Dataset<br>2 | Dataset<br>3 | Dataset<br>4 | Dataset<br>5 | Dataset<br>6 | Dataset<br>7 | Dataset<br>8 | Dataset<br>9 | Dataset<br>10 |
|----------------------------------|--------------|--------------|--------------|--------------|--------------|--------------|--------------|--------------|--------------|---------------|
| IP age                           | X            | X            |              | X            | X            | X            | X            | X            | X            | X             |
| IP gender                        | X            |              |              | X            | X            | X            | X            | X            | X            | X             |
| IP race                          | X            | X            | X            | X            | X            | X            | X            | X            | X            | X             |
| IP ethnicity                     | X            | X            | X            | X            | X            | X            | X            | X            | X            | X             |
| IP education                     | X            |              | X            |              | X            | X            | X            | X            | X            | X             |
| IP PTSD<br>diagnostic<br>status  | X            |              |              |              | X            |              |              |              | X            | X             |
| IP PTSD<br>symptom<br>severity   | X            | X            | X            | X            | X            | X            | X            | X            | X            | X             |
| IP<br>veteran/military<br>status | X            | X            | X            | X            | X            | X            | X            |              | X            | X             |
| FM age                           | X            | X            | X            |              |              | X            |              | X            | X            | X             |
| FM gender                        | X            |              | X            | X            |              | X            | X            | X            | X            | X             |
| FM race                          | X            | X            | X            |              |              | X            |              | X            | X            | X             |
| FM ethnicity                     | X            | X            | X            |              |              | X            |              | X            | X            | X             |
| FM education                     | X            |              | X            |              |              | X            |              | X            | X            | X             |
| FM PTSD<br>diagnostic<br>status  | X            |              |              | X            | X            |              |              |              |              |               |
| FM PTSD<br>symptom<br>severity   |              |              |              |              |              |              |              |              | X            |               |
| FM<br>veteran/military<br>status |              | X            | X            |              |              |              |              |              | X            |               |
| FM<br>relationship to<br>IP      | X            | X            | X            | X            | X            | X            |              | X            | X            | X             |
| FM SORTS                         | X            | X            | X            | X            | X            | X            | X            | X            | X            | X             |

*Note.* IP = identified patient; FM = family member; PTSD = posttraumatic stress disorder; SORTS = Significant Others' Responses to Trauma Scale.

Table S2.

*Fit Statistics Across EFA Models*

|                            | $\chi^2$ | df | <i>p</i> | CFI   | TLI   | RMSEA 90% CI  | RMSR  |
|----------------------------|----------|----|----------|-------|-------|---------------|-------|
| Summed model, 1 factor     | 468.18   | 77 | <.001    | 0.830 | 0.799 | 0.125 – 0.149 | 0.072 |
| Summed model, 2 factors    | 194.76   | 64 | <.001    | 0.943 | 0.919 | 0.073 – 0.101 | 0.037 |
| Frequency model, 1 factor  | 440.58   | 77 | <.001    | 0.930 | 0.918 | 0.120 – 0.144 | 0.094 |
| Frequency model, 2 factors | 133.81   | 64 | <.001    | 0.987 | 0.981 | 0.048 – 0.078 | 0.042 |
| Distress model, 1 factor   | 375.96   | 77 | <.001    | 0.942 | 0.931 | 0.108 – 0.132 | 0.089 |
| Distress model, 2 factors  | 107.73   | 64 | <.001    | 0.991 | 0.988 | 0.033 – 0.066 | 0.041 |

*Note.* Summed model uses a sum of the frequency and distress items for a given type of accommodation (14 indicators with a possible score of 0-8). Frequency model only includes scores on the frequency items (14 indicators with a possible score of 0-4). Distress model only includes scores on the distress items (14 indicators with a possible score of 0-4). EFA = exploratory factor analysis; CFI = Bentler comparative fit index; TLI = Tucker-Lewis index; RMSEA 90% CI = 90% confidence interval of the root mean square error of approximation; RMSR = standardized root mean square residual.

Table S3.

*Factor Loadings for Two-Factor EFA Models Using Summed Frequency/Distress Items, Only Frequency Items, and Only Distress Items*

|                                                                                                                         | Summed model |              | Frequency model |              | Distress model |              |
|-------------------------------------------------------------------------------------------------------------------------|--------------|--------------|-----------------|--------------|----------------|--------------|
|                                                                                                                         | Factor 1     | Factor 2     | Factor 1        | Factor 2     | Factor 1       | Factor 2     |
| 1. Avoid [Name] because of his/her irritable or angry mood?                                                             | <b>0.823</b> | 0.014        | <b>0.808</b>    | 0.114        | <b>0.781</b>   | 0.058        |
| 2. Avoid being physically close with [Name] because of his/her discomfort?                                              | 0.285*       | <b>0.345</b> | <b>0.411</b>    | 0.308*       | <b>0.396</b>   | 0.313*       |
| 3. Cancel or rearrange plans or social activities because [Name] did not want to do them?                               | 0.106        | <b>0.685</b> | 0.000           | <b>0.835</b> | 0.088          | <b>0.787</b> |
| 4. Avoid doing things, going places, or seeing people with [Name] that make him/her anxious or uncomfortable?           | -0.042       | <b>0.803</b> | -0.160          | <b>0.963</b> | -0.048         | <b>0.879</b> |
| 5. "Bite your tongue" or hold back from trying to discuss any relationship issues with [Name]?                          | <b>0.899</b> | -0.051       | <b>0.941</b>    | -0.051       | <b>0.927</b>   | -0.049       |
| 6. Take over a task or chore for [Name] that he/she is uncomfortable doing because of his/her traumatic event?          | 0.047        | <b>0.457</b> | -0.063          | <b>0.748</b> | 0.021          | <b>0.633</b> |
| 7. Help [Name] with a task because he/she was having trouble concentrating?                                             | 0.136        | <b>0.505</b> | 0.014           | <b>0.662</b> | 0.137          | <b>0.590</b> |
| 8. Make excuses to others for [Name]'s behavior or try to manage his/her relationships with other people?               | <b>0.665</b> | 0.175*       | <b>0.517</b>    | 0.348*       | <b>0.691</b>   | 0.213*       |
| 9. "Tiptoe" around [Name] so as not to anger him/her?                                                                   | <b>0.908</b> | -0.008       | <b>0.901</b>    | 0.038        | <b>0.948</b>   | -0.002       |
| 10. Avoid discussing events related to [Name]'s traumatic event(s) in front of him/her to avoid his/her becoming upset? | 0.321*       | <b>0.374</b> | 0.232*          | <b>0.504</b> | <b>0.484</b>   | 0.322*       |
| 11. Not share your own feelings or concerns with [Name] due to concerns that he/she would become upset?                 | <b>0.788</b> | 0.033        | <b>0.896</b>    | -0.020       | <b>0.794</b>   | 0.065        |
| 12. Change your routine due to [Name]'s difficulties?                                                                   | -0.001       | <b>0.806</b> | 0.052           | <b>0.812</b> | 0.006          | <b>0.883</b> |
| 13. How much have you modified your leisure activities due to [Name]'s difficulties?                                    | -0.001       | <b>0.813</b> | 0.061           | <b>0.793</b> | -0.013         | <b>0.894</b> |

|                                                                          |              |        |              |       |              |        |
|--------------------------------------------------------------------------|--------------|--------|--------------|-------|--------------|--------|
| 14. Give up control to [Name] because of his/her desire to be in charge? | <b>0.642</b> | -0.001 | <b>0.581</b> | 0.033 | <b>0.740</b> | -0.023 |
|--------------------------------------------------------------------------|--------------|--------|--------------|-------|--------------|--------|

*Note.* Summed model uses a sum of the frequency and distress items for a given type of accommodation (14 indicators with a possible score of 0-8). Frequency model only includes scores on the frequency items (14 indicators with a possible score of 0-4). Distress model only includes scores on the distress items (14 indicators with a possible score of 0-4). Factor 1 represents “anger-related accommodation”; Factor 2 represents “anxiety-related accommodation.” Bold text indicates primary loading, \* = significant cross-loading. SORTS = Significant Others’ Responses to Trauma Scale.

Table S4.

*Correlations Between Latent Factors Across the Two-Factor EFA Models*

|                 | <i>r</i> |
|-----------------|----------|
| Summed model    | .698     |
| Frequency model | .680     |
| Distress model  | .689     |

*Note.* Summed model uses a sum of the frequency and distress items for a given type of accommodation (14 indicators with a possible score of 0-8). Frequency model only includes scores on the frequency items (14 indicators with a possible score of 0-4). Distress model only includes scores on the distress items (14 indicators with a possible score of 0-4).

Table S5.

*Parameter Estimates (and Standard Errors) of Item Discrimination and Difficulty by SORTS Item and Severity Score*

| Item                                                                                                                    | <i>a</i>      | <i>b</i> <sub>1</sub> | <i>b</i> <sub>2</sub> | <i>b</i> <sub>3</sub> | <i>b</i> <sub>4</sub> |
|-------------------------------------------------------------------------------------------------------------------------|---------------|-----------------------|-----------------------|-----------------------|-----------------------|
| 1A – Avoid [Name] because of his/her irritable or angry mood? (Freq)                                                    | 1.964 (0.190) | -1.382 (0.176)        | 0.616 (0.155)         | 1.862 (0.190)         | 4.056 (0.314)         |
| 1B – Avoid [Name] because of his/her irritable or angry mood? (Dis)                                                     | 2.026 (0.195) | -0.898 (0.163)        | 0.126 (0.156)         | 1.254 (0.175)         | 2.833 (0.232)         |
| 2A – Avoid being physically close with [Name] because of his/her discomfort? (Freq)                                     | 1.307 (0.133) | 0.225 (0.126)         | 1.466 (0.154)         | 2.177 (0.178)         | 3.274 (0.245)         |
| 2B – Avoid being physically close with [Name] because of his/her discomfort? (Dis)                                      | 1.642 (0.169) | 0.365 (0.143)         | 1.056 (0.154)         | 1.720 (0.171)         | 2.851 (0.218)         |
| 3A – Cancel or rearrange plans or social activities because [Name] did not want to do them? (Freq)                      | 1.652 (0.179) | -0.280 (0.139)        | 2.315 (0.200)         | 3.644 (0.251)         | 5.568 (0.465)         |
| 3B – Cancel or rearrange plans or social activities because [Name] did not want to do them? (Dis)                       | 2.045 (0.213) | 0.213 (0.159)         | 1.408 (0.179)         | 2.521 (0.224)         | 3.969 (0.311)         |
| 4A – Avoid doing things, going places, or seeing people with [Name] that make him/her anxious or uncomfortable? (Freq)  | 1.871 (0.200) | -0.347 (0.149)        | 2.015 (0.191)         | 2.927 (0.241)         | 4.300 (0.325)         |
| 4B – Avoid doing things, going places, or seeing people with [Name] that make him/her anxious or uncomfortable? (Dis)   | 2.470 (0.276) | 0.460 (0.183)         | 1.708 (0.213)         | 3.041 (0.281)         | 4.456 (0.394)         |
| 5A – “Bite your tongue” or hold back from trying to discuss any relationship issues with [Name]? (Freq)                 | 2.773 (0.289) | -1.866 (0.235)        | 0.414 (0.193)         | 1.992 (0.245)         | 3.930 (0.365)         |
| 5B – “Bite your tongue” or hold back from trying to discuss any relationship issues with [Name]? (Dis)                  | 3.180 (0.314) | -1.550 (0.240)        | -0.084 (0.207)        | 1.627 (0.247)         | 3.612 (0.336)         |
| 6A – Take over a task or chore for [Name] that he/she is uncomfortable doing because of his/her traumatic event? (Freq) | 1.726 (0.189) | 0.580 (0.147)         | 1.841 (0.179)         | 2.663 (0.210)         | 3.702 (0.262)         |
| 6B – Take over a task or chore for [Name] that he/she is uncomfortable doing because of his/her traumatic event? (Dis)  | 2.105 (0.260) | 1.574 (0.200)         | 2.606 (0.228)         | 3.773 (0.293)         | 4.886 (0.415)         |
| 7A – Help [Name] with a task because he/she was having trouble concentrating? (Freq)                                    | 1.734 (0.178) | -0.986 (0.154)        | 0.720 (0.148)         | 1.808 (0.174)         | 3.335 (0.251)         |

|                                                                                                                                  |               |                |               |               |               |
|----------------------------------------------------------------------------------------------------------------------------------|---------------|----------------|---------------|---------------|---------------|
| 7B – Help [Name] with a task because he/she was having trouble concentrating? (Dis)                                              | 1.844 (0.227) | 1.105 (0.170)  | 2.560 (0.219) | 3.523 (0.261) | 4.741 (0.342) |
| 8A – Make excuses to others for [Name]’s behavior or try to manage his/her relationships with other people? (Freq)               | 1.898 (0.186) | -0.510 (0.153) | 1.721 (0.180) | 2.949 (0.227) | 3.787 (0.270) |
| 8B – Make excuses to others for [Name]’s behavior or try to manage his/her relationships with other people? (Dis)                | 2.378 (0.230) | -0.053 (0.173) | 1.205 (0.186) | 2.618 (0.230) | 4.391 (0.334) |
| 9A – “Tiptoe” around [Name] so as not to anger him/her? (Freq)                                                                   | 3.376 (0.393) | -1.223 (0.251) | 1.153 (0.240) | 2.751 (0.325) | 4.480 (0.456) |
| 9B – “Tiptoe” around [Name] so as not to anger him/her? (Dis)                                                                    | 3.622 (0.427) | -0.946 (0.252) | 0.677 (0.235) | 2.023 (0.298) | 4.261 (0.458) |
| 10A – Avoid discussing events related to [Name]’s traumatic event(s) in front of him/her to avoid his/her becoming upset? (Freq) | 1.483 (0.159) | 0.092 (0.132)  | 1.560 (0.159) | 2.272 (0.189) | 3.130 (0.235) |
| 10B – Avoid discussing events related to [Name]’s traumatic event(s) in front of him/her to avoid his/her becoming upset? (Dis)  | 1.504 (0.186) | 1.151 (0.156)  | 2.129 (0.181) | 3.063 (0.229) | 4.333 (0.316) |
| 11A – Not share your own feelings or concerns with [Name] due to concerns that he/she would become upset? (Freq)                 | 2.938 (0.288) | -1.756 (0.233) | 0.825 (0.209) | 2.507 (0.274) | 4.321 (0.378) |
| 11B – Not share your own feelings or concerns with [Name] due to concerns that he/she would become upset? (Dis)                  | 3.234 (0.329) | -1.109 (0.225) | 0.377 (0.218) | 1.950 (0.257) | 4.175 (0.387) |
| 12A – Change your routine due to [Name]’s difficulties? (Freq)                                                                   | 3.210 (0.381) | -0.665 (0.218) | 2.092 (0.269) | 3.595 (0.385) | 5.660 (0.557) |
| 12B – Change your routine due to [Name]’s difficulties? (Dis)                                                                    | 3.072 (0.347) | 0.356 (0.212)  | 2.259 (0.277) | 3.736 (0.370) | 5.378 (0.498) |
| 13A – How much have you modified your leisure activities due to [Name]’s difficulties? (Freq)                                    | 2.783 (0.272) | -1.121 (0.202) | 1.346 (0.207) | 3.217 (0.290) | 5.854 (0.495) |
| 13B – How much have you modified your leisure activities due to [Name]’s difficulties? (Dis)                                     | 3.510 (0.384) | -0.222 (0.231) | 2.176 (0.289) | 3.773 (0.377) | 5.508 (0.517) |
| 14A – Give up control to [Name] because of his/her desire to be in charge? (Freq)                                                | 1.402 (0.157) | -0.018 (0.140) | 1.364 (0.159) | 2.272 (0.192) | 3.193 (0.241) |
| 14B – Give up control to [Name] because of his/her desire to be in charge? (Dis)                                                 | 1.746 (0.200) | 0.542 (0.157)  | 1.876 (0.191) | 2.729 (0.230) | 3.976 (0.301) |

*Note.*  $a$  = item discrimination;  $b_1$  = item difficulty for the 1 – “1 or 2 times per month” or “somewhat” score;  $b_2$  = item difficulty for the 2 - “1 or 2 times per week” or “moderately” score;  $b_3$  = item difficulty for the 3 - “several times per week” or “significantly” score;  $b_4$  = item difficulty for the 4 - “daily or almost every day” or “extremely” score; Freq = frequency; Dis = distress.



Supplementary figures

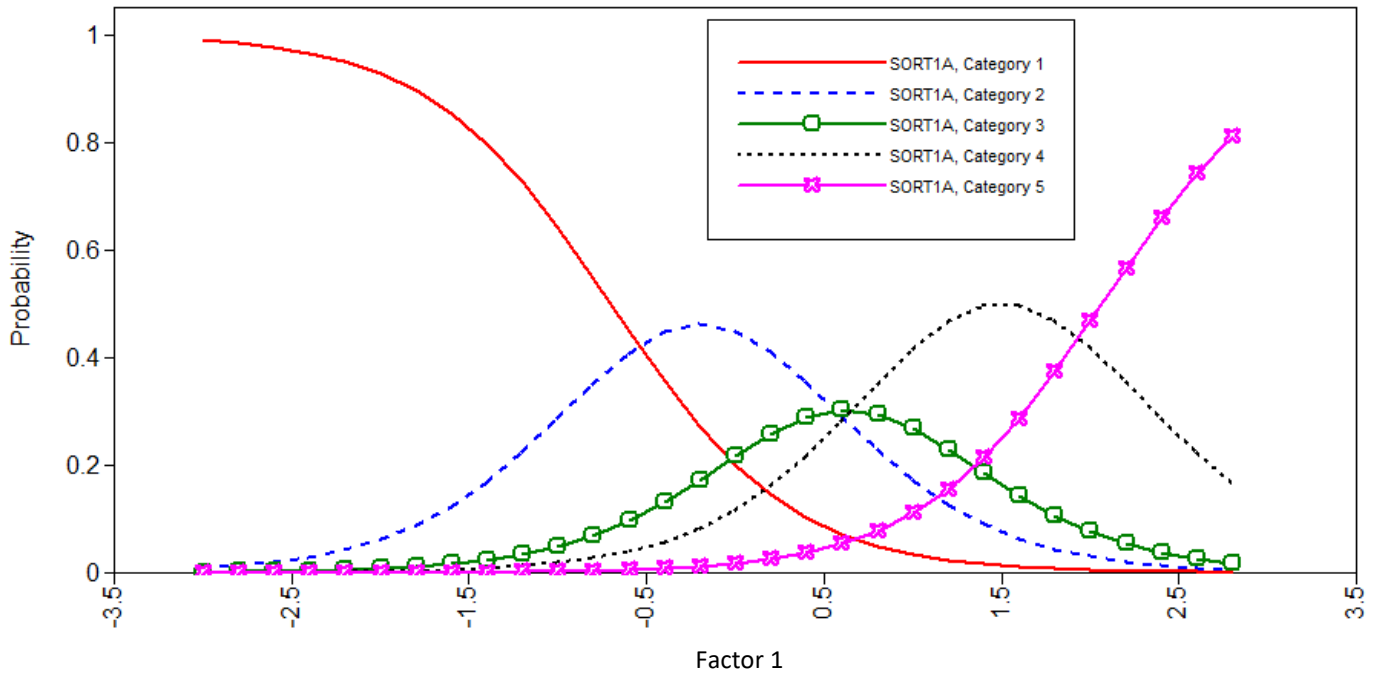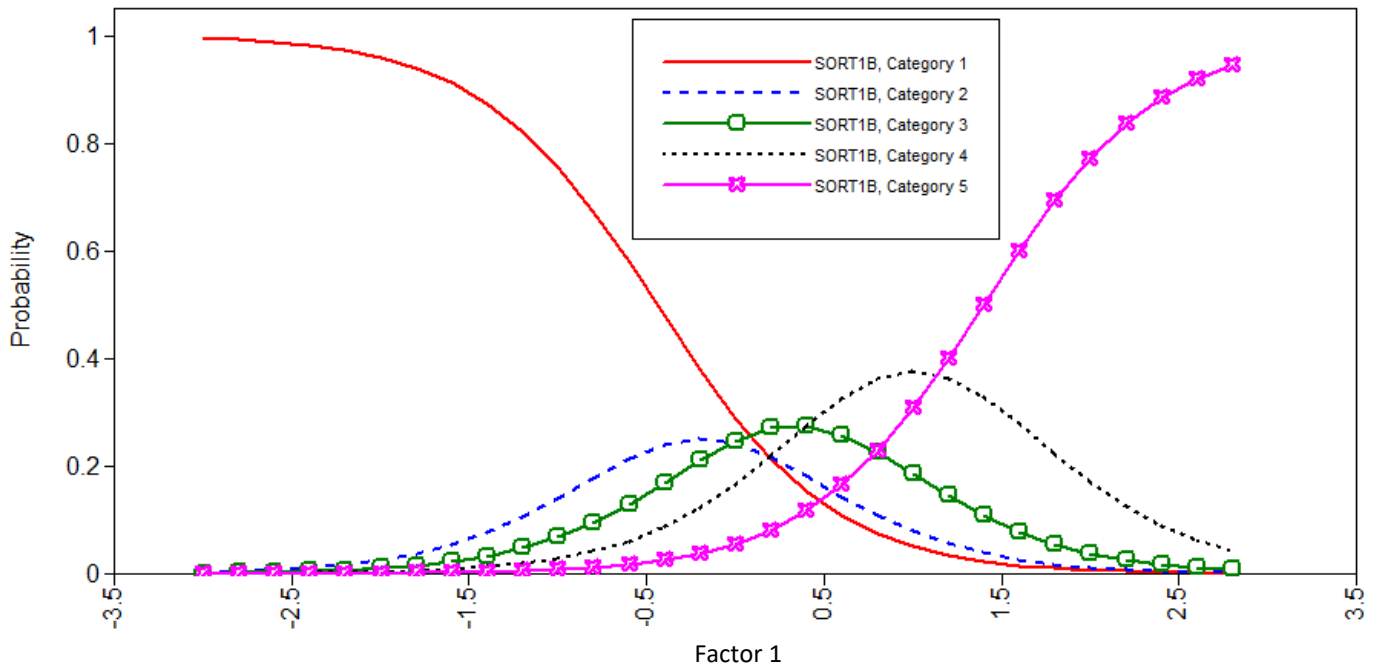

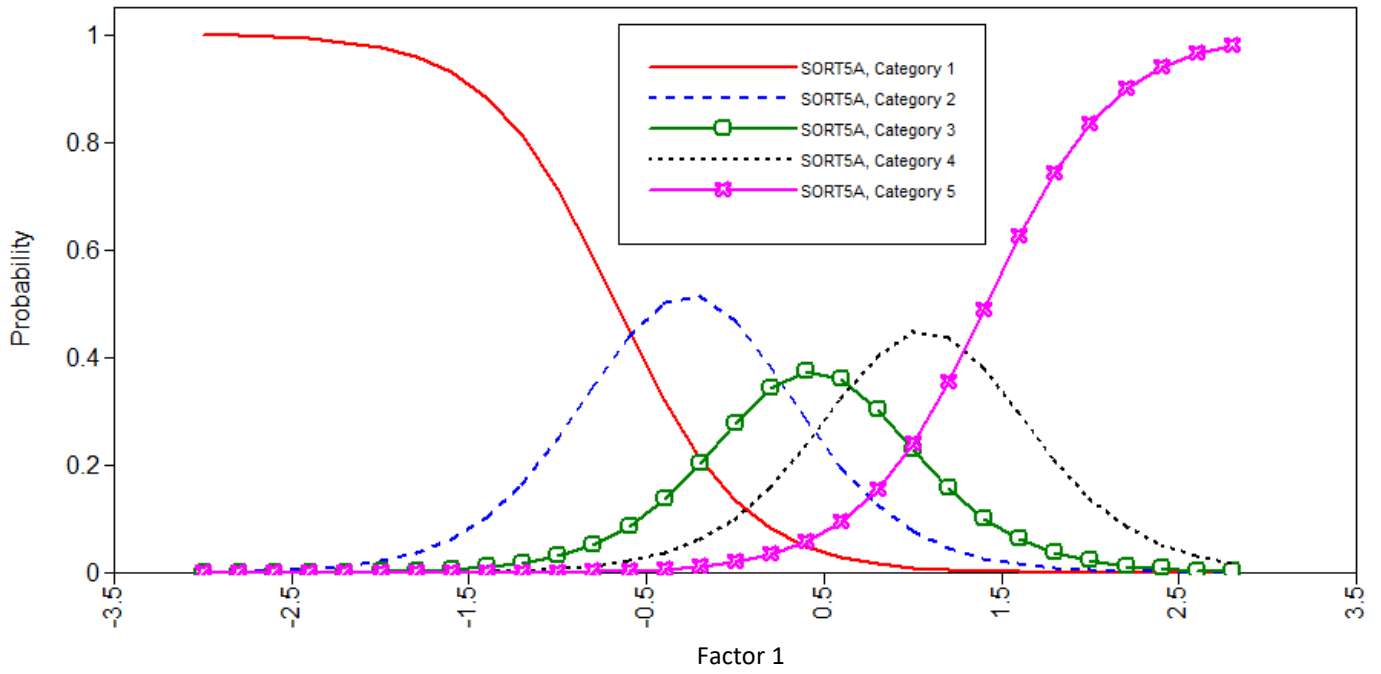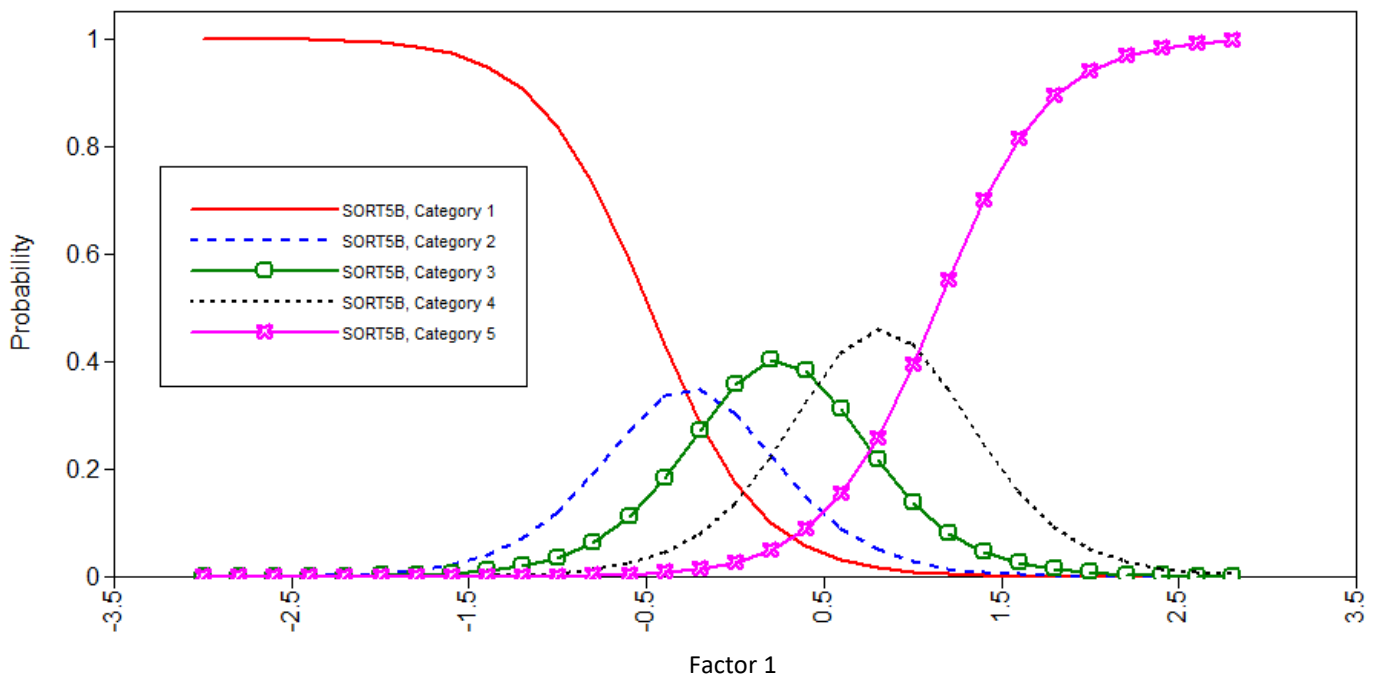

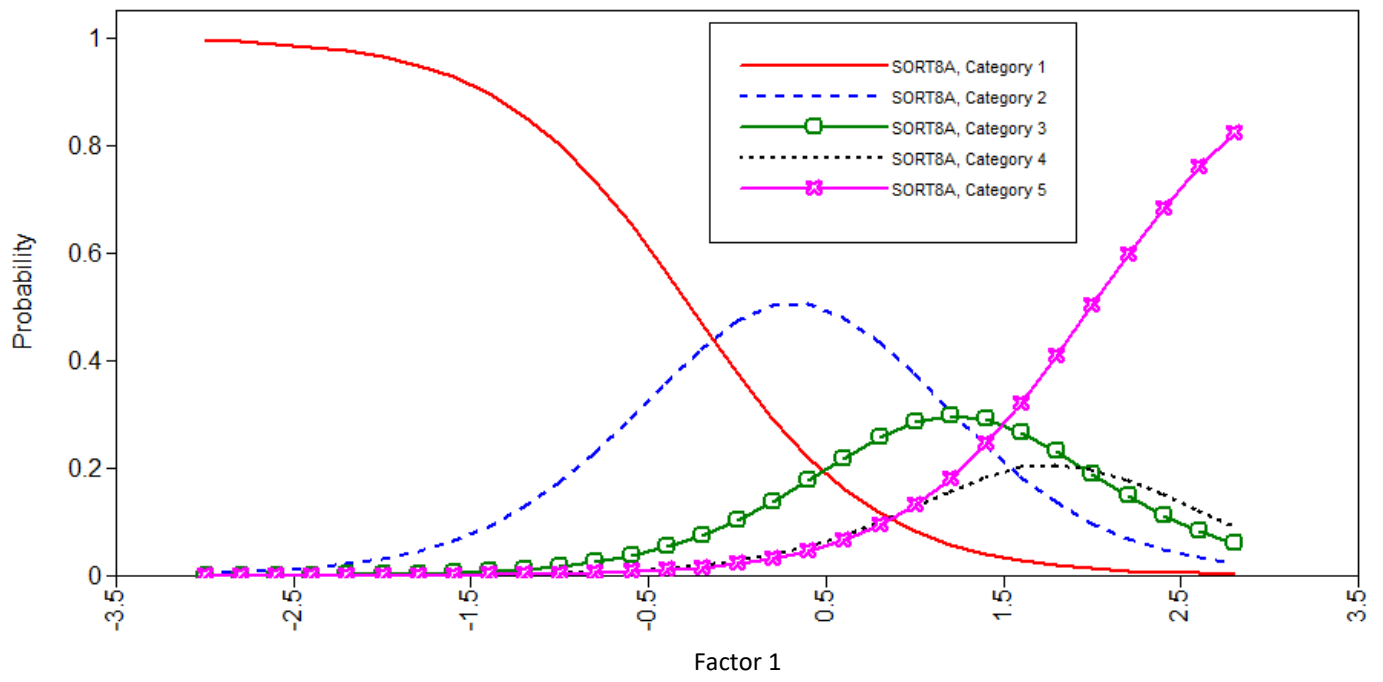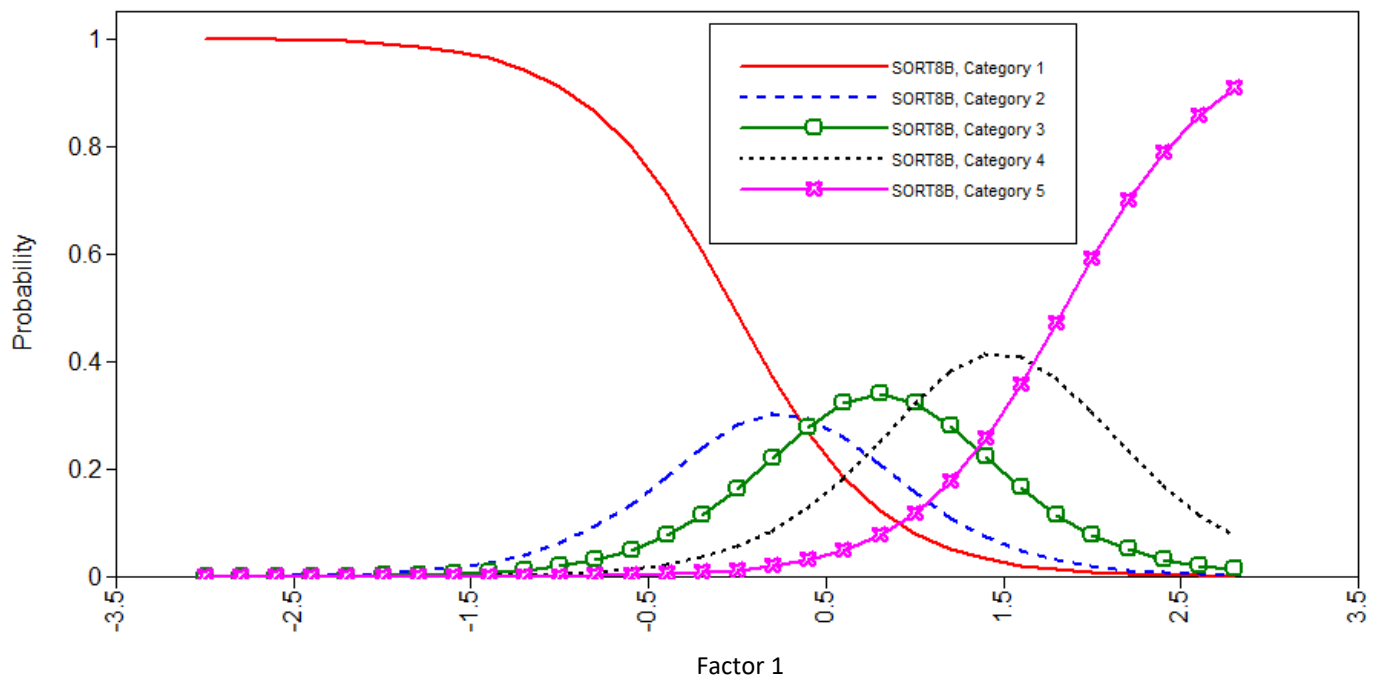

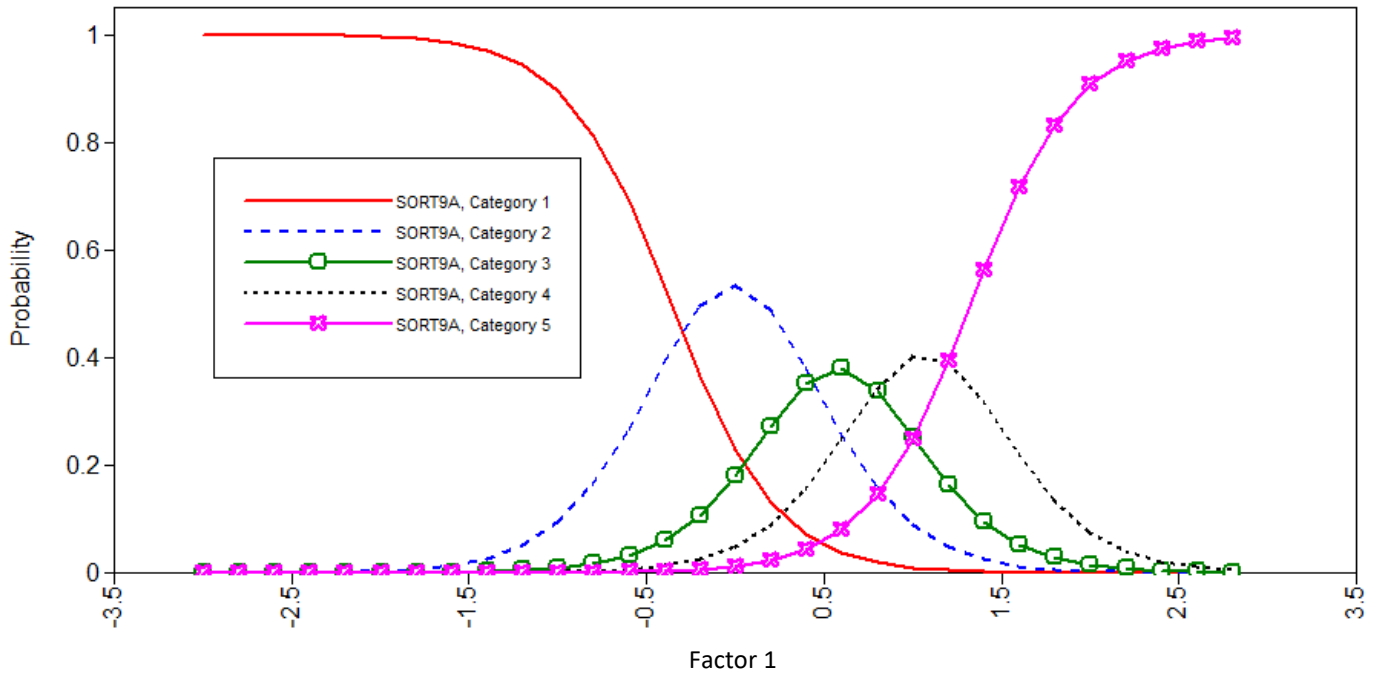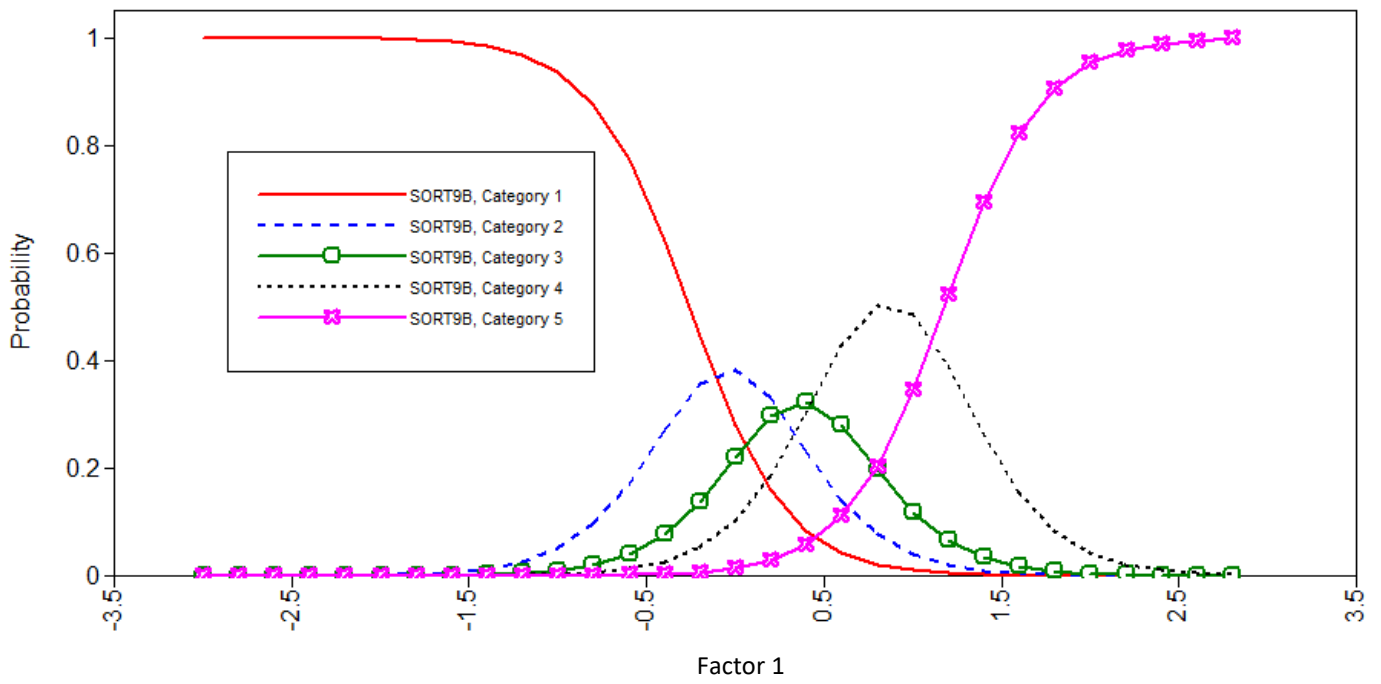

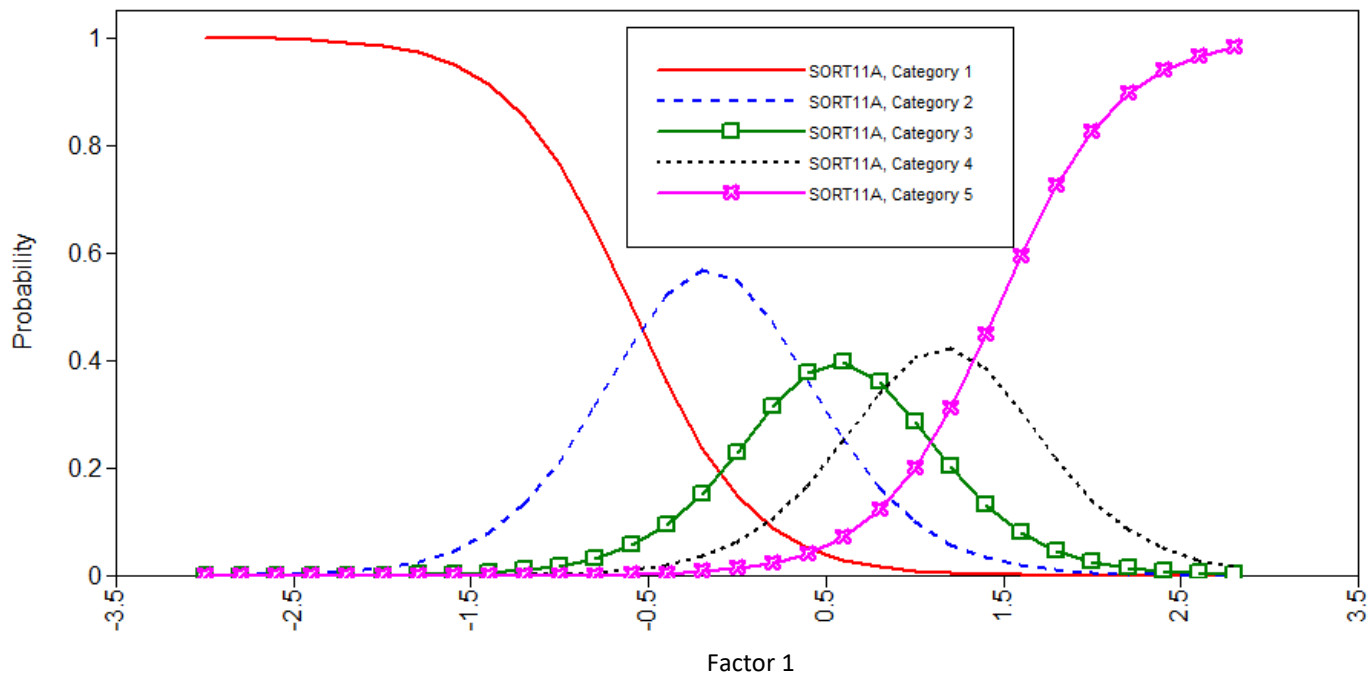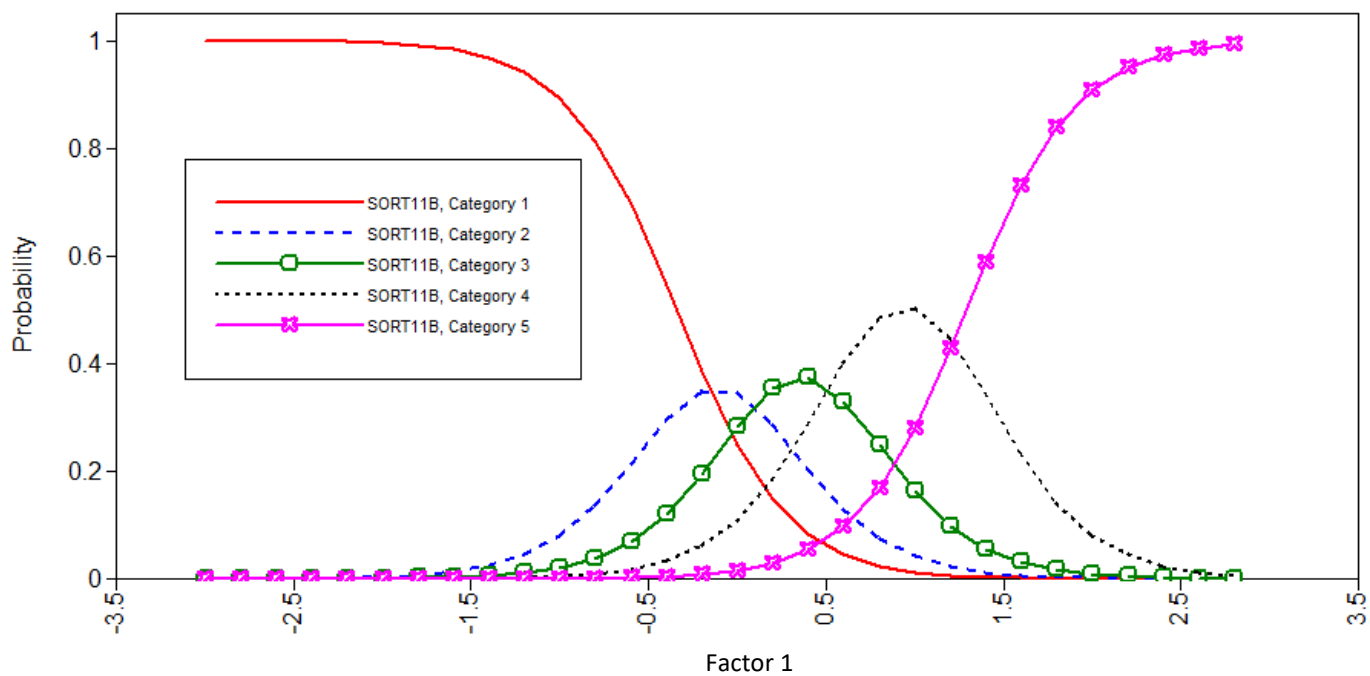

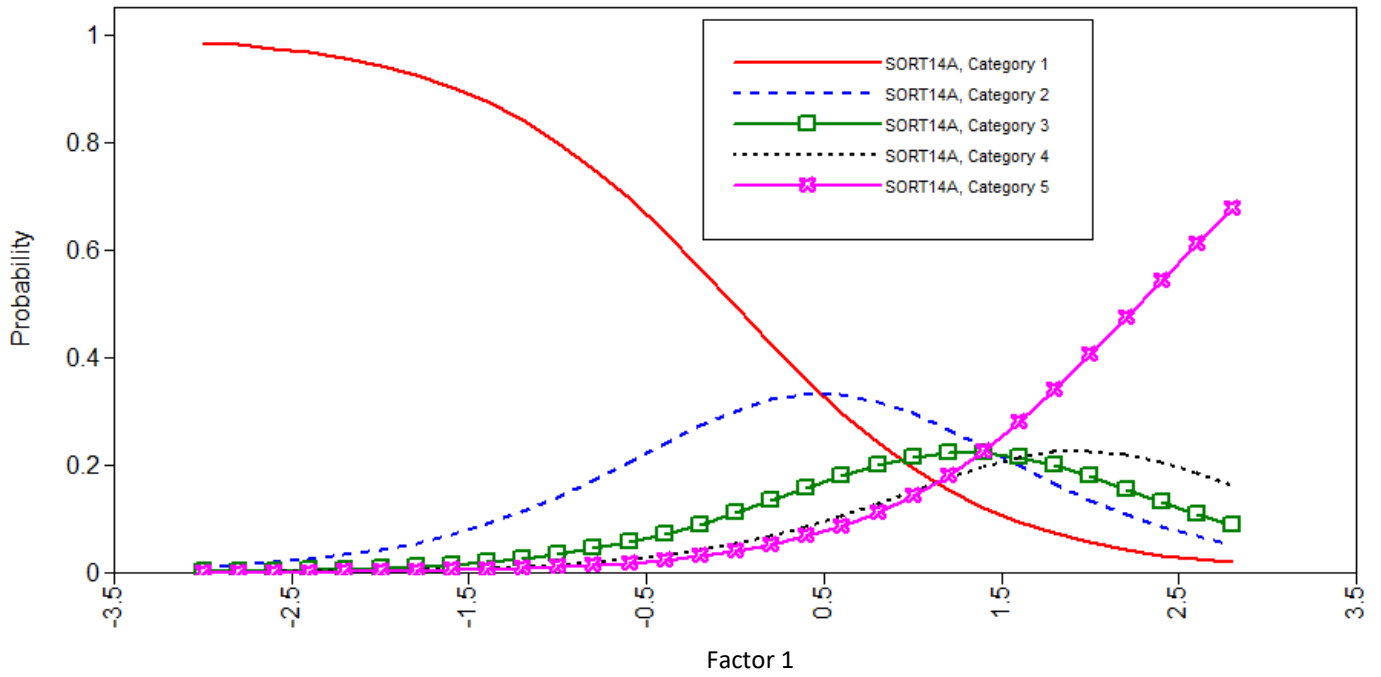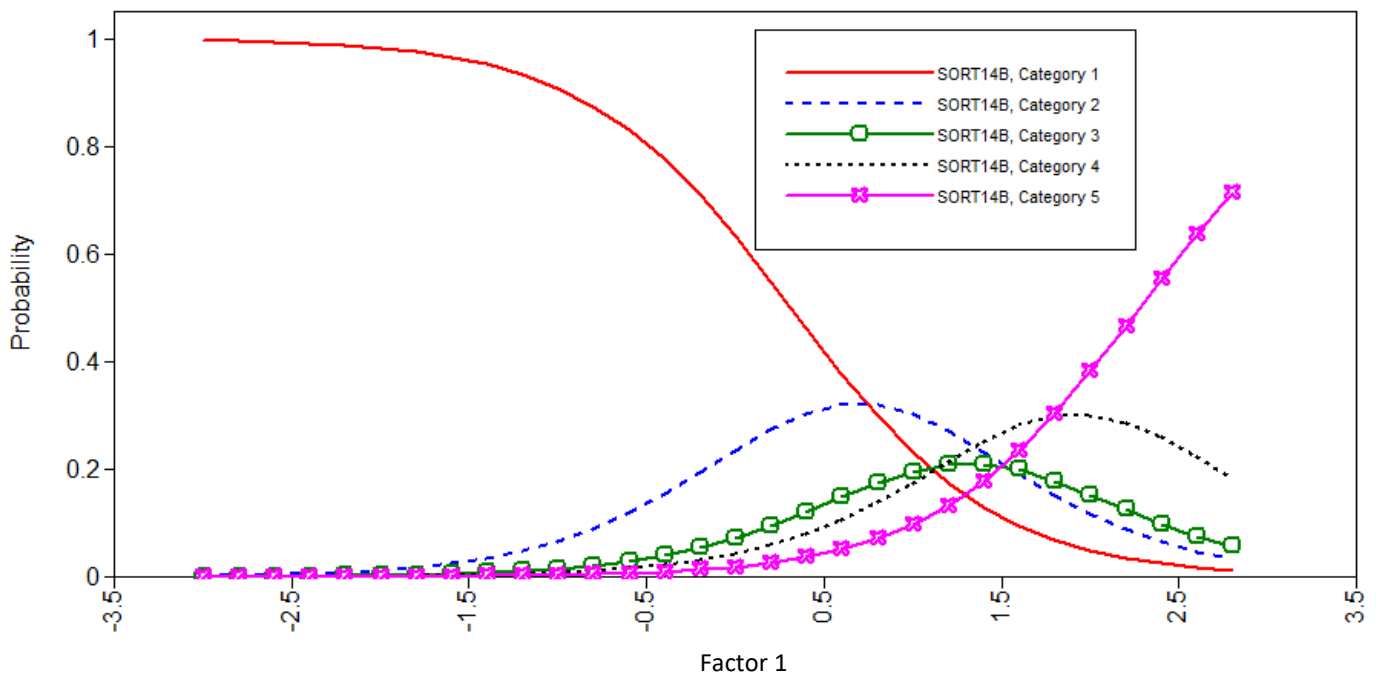

Figure S1. Item characteristic curves (ICCs) for individual items from the Significant Others' Responses to Trauma Scale (SORTS) loading onto Factor 1 (anger-related accommodation).

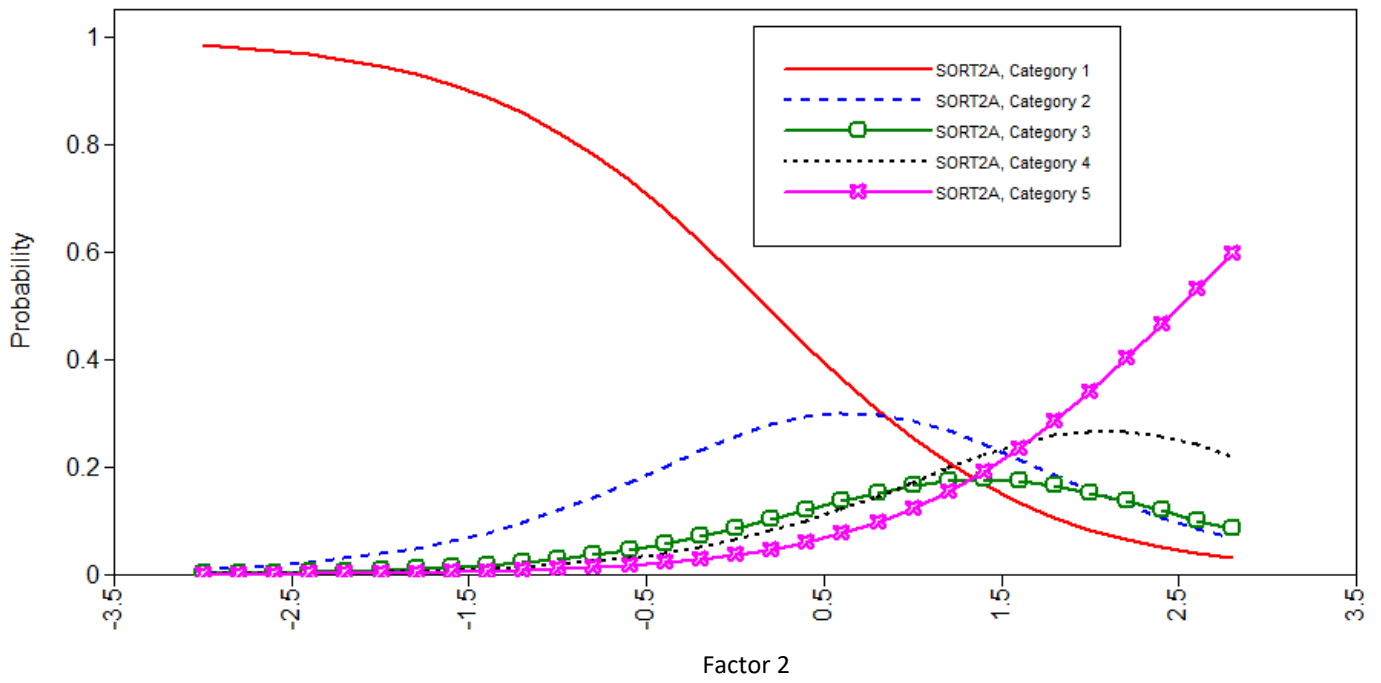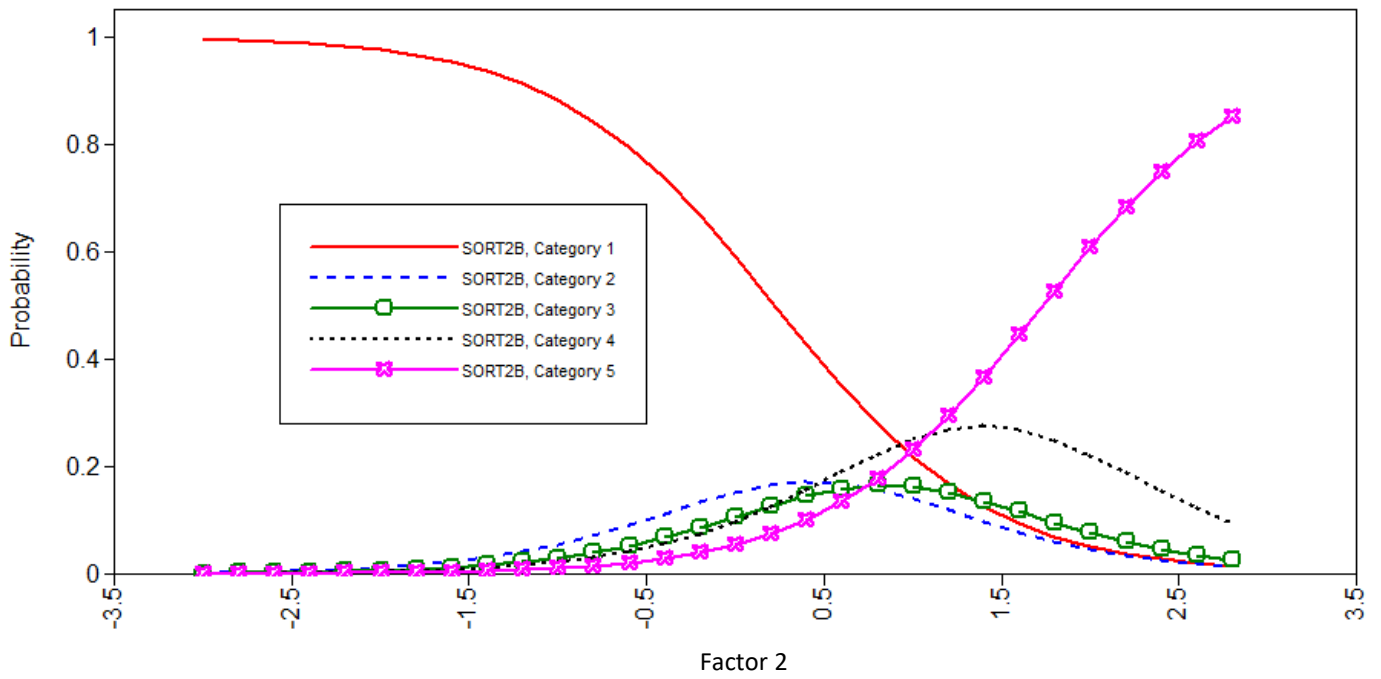

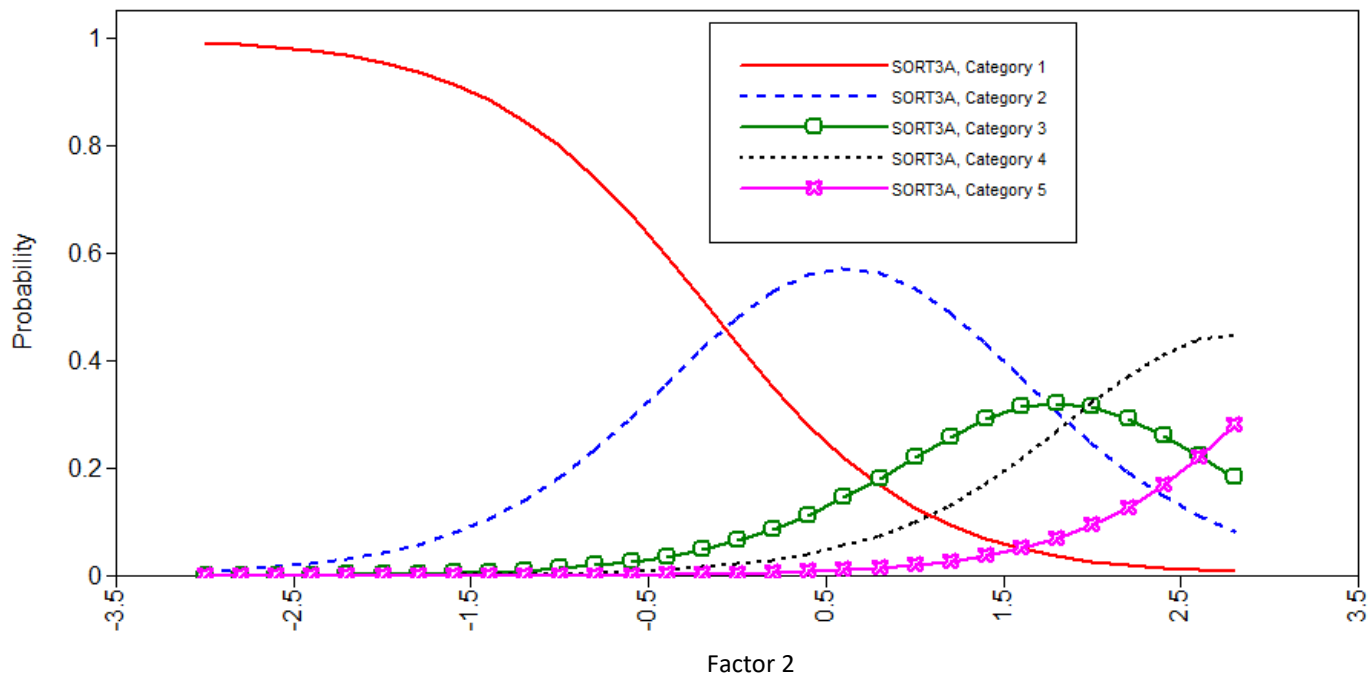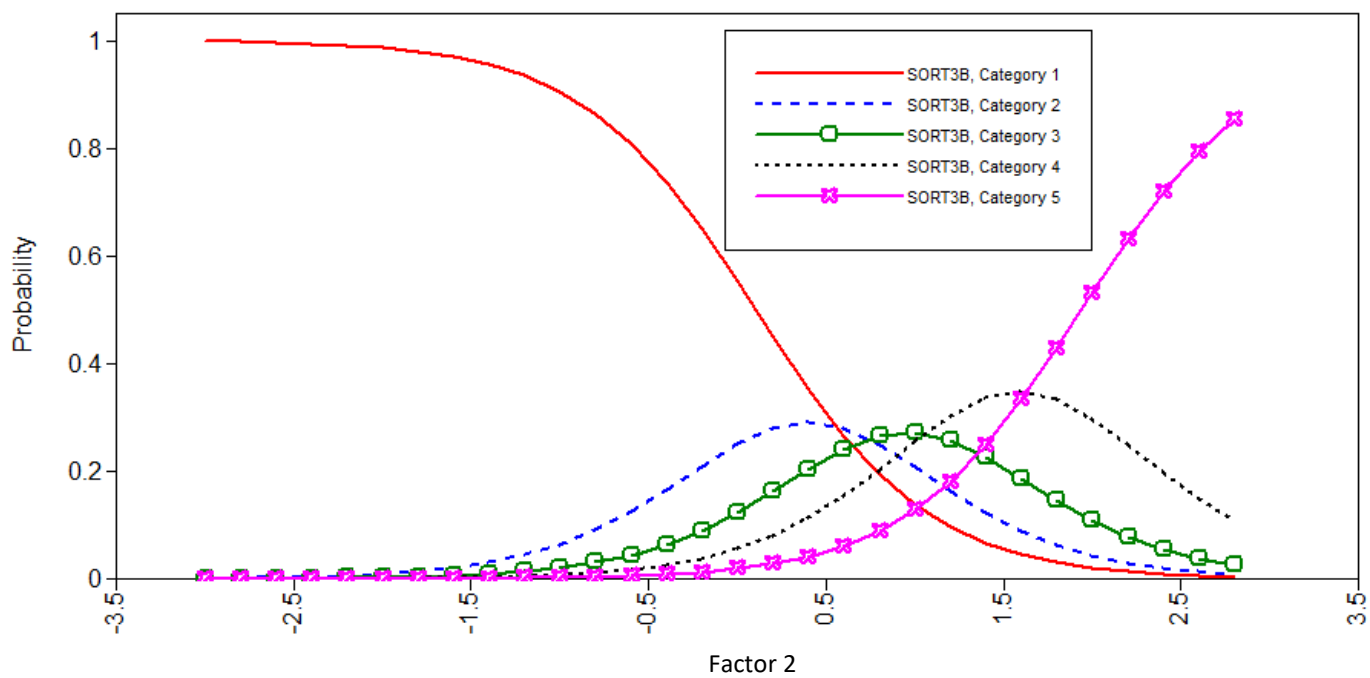



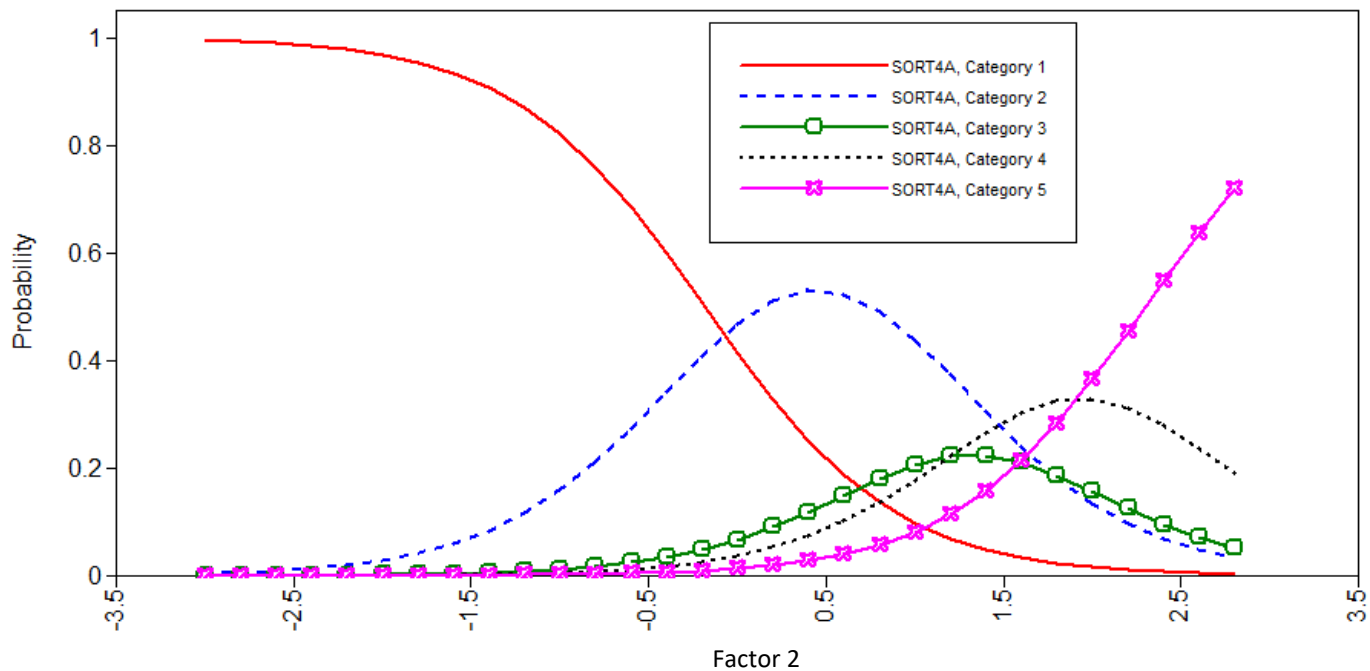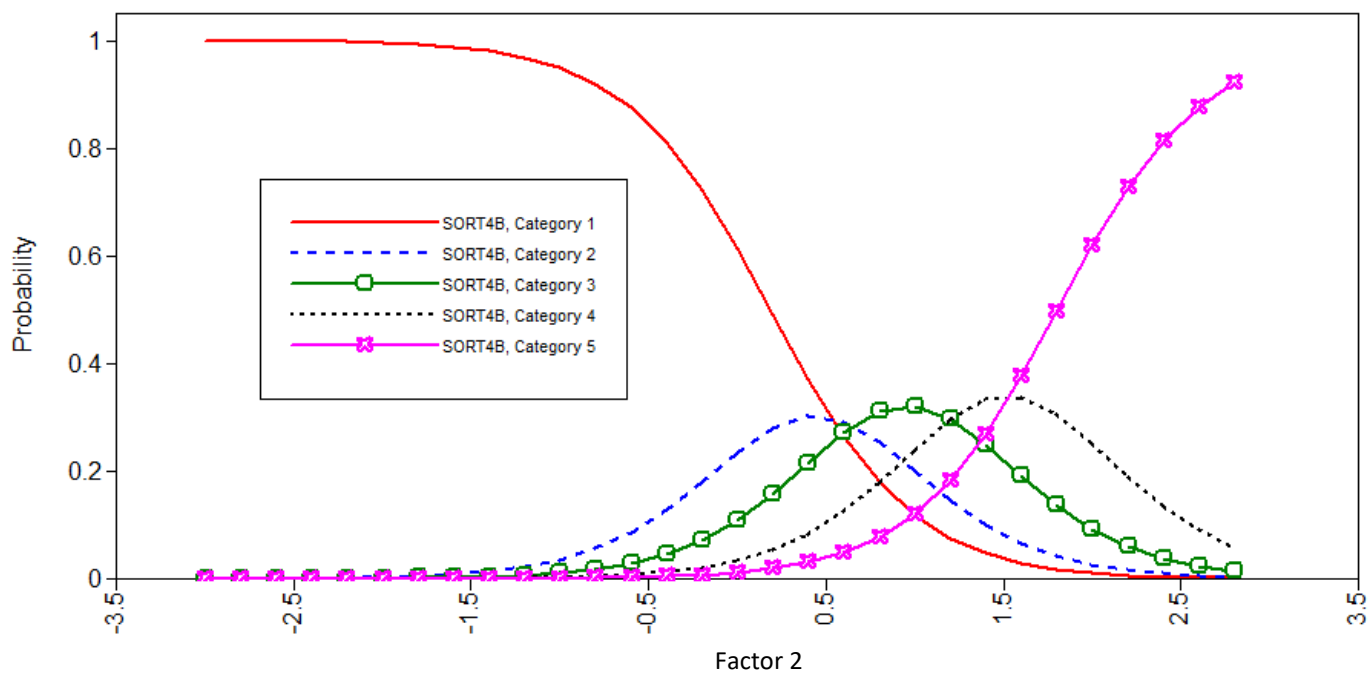

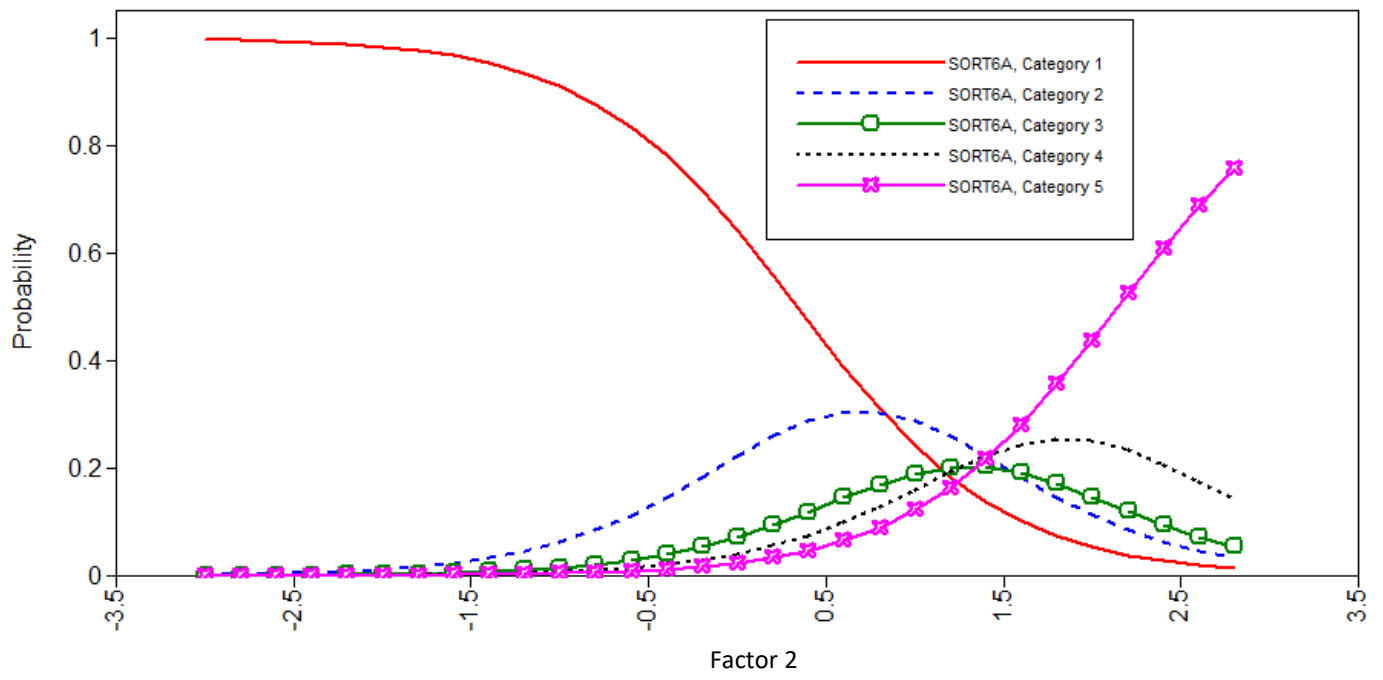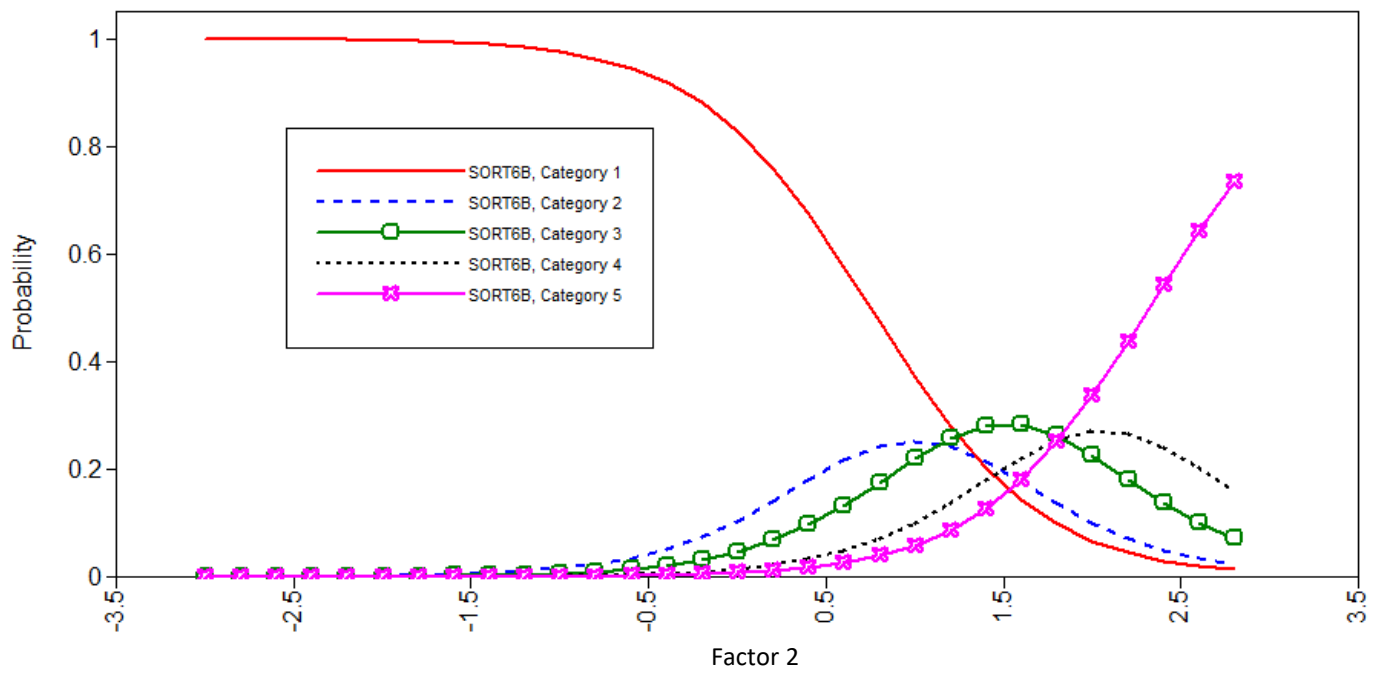

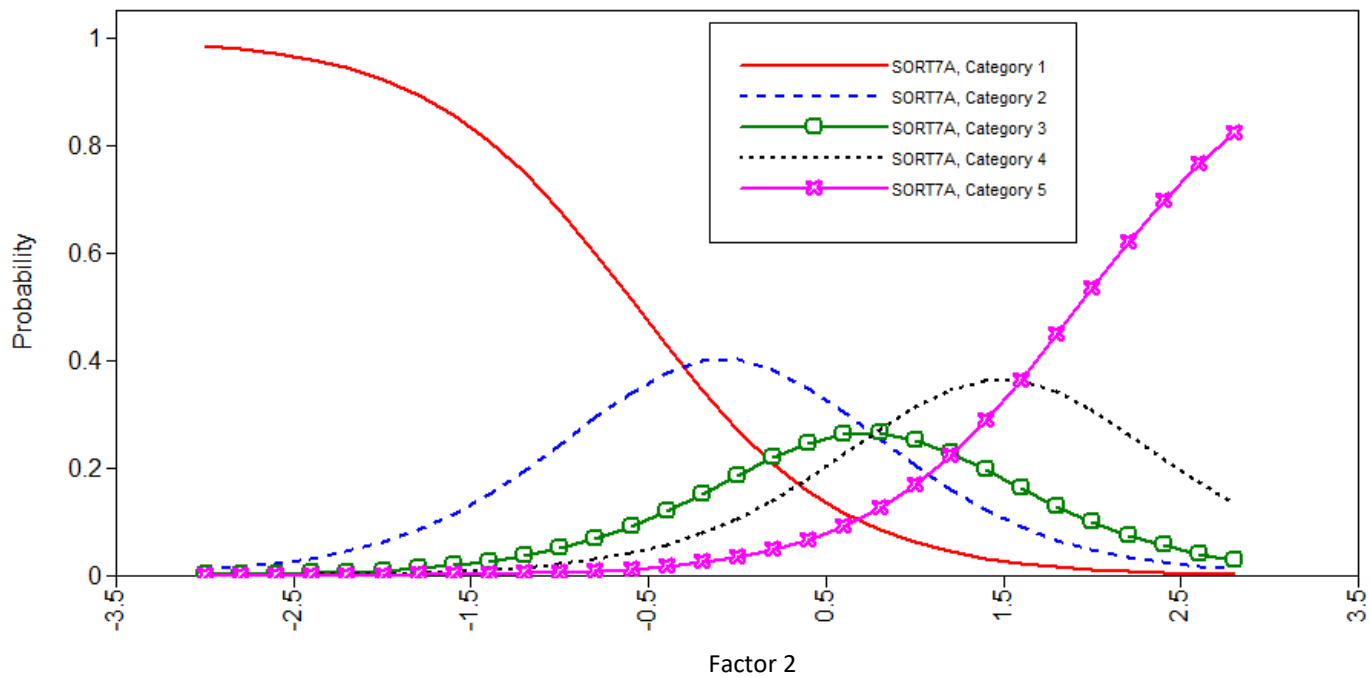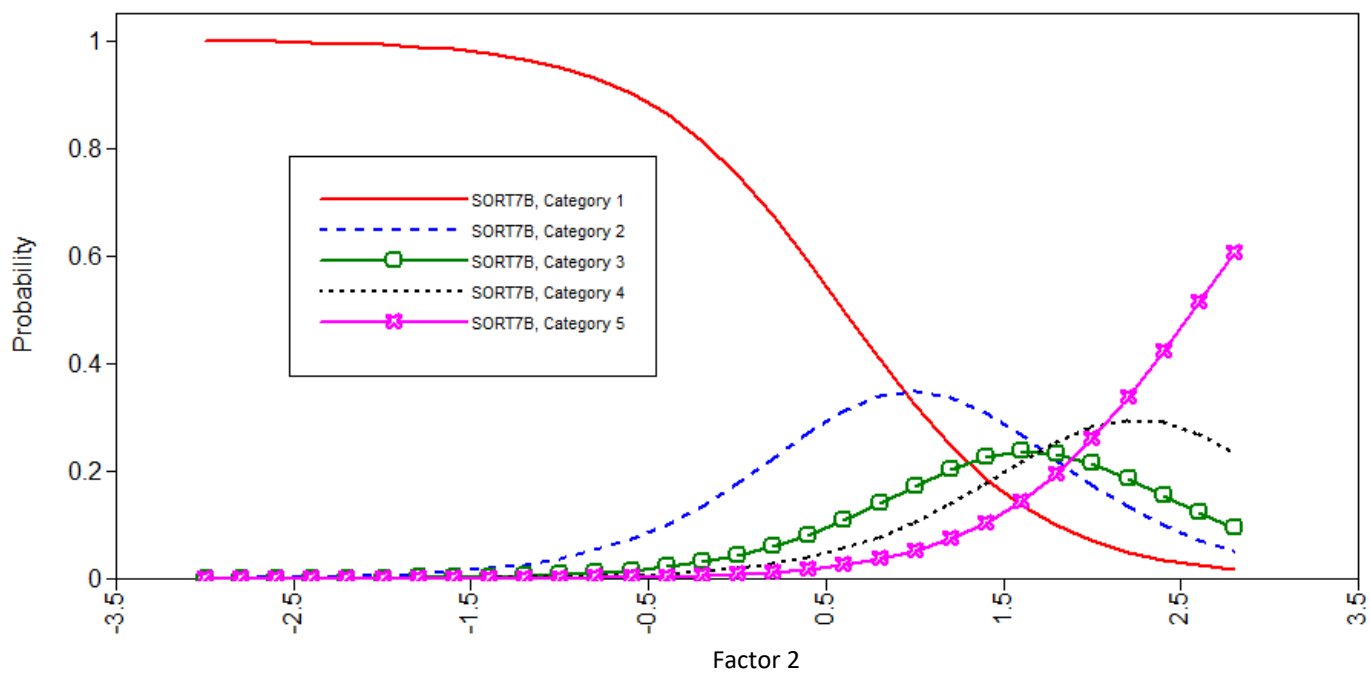

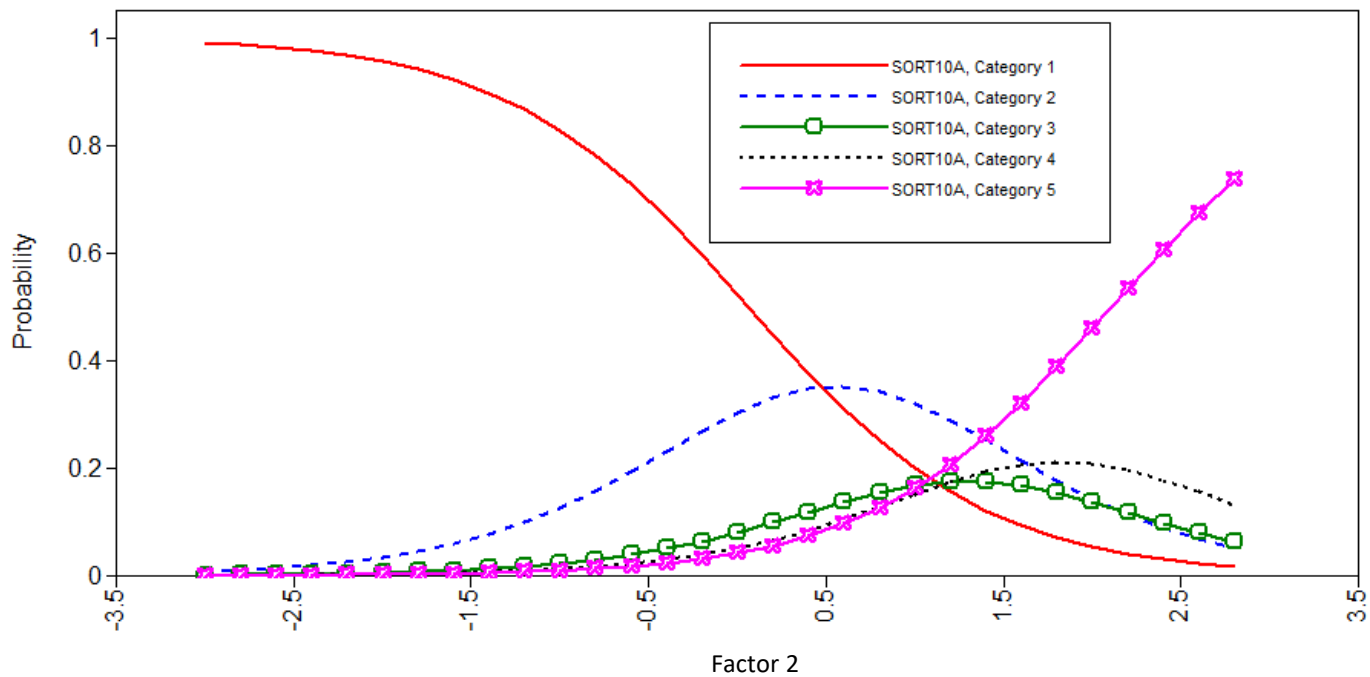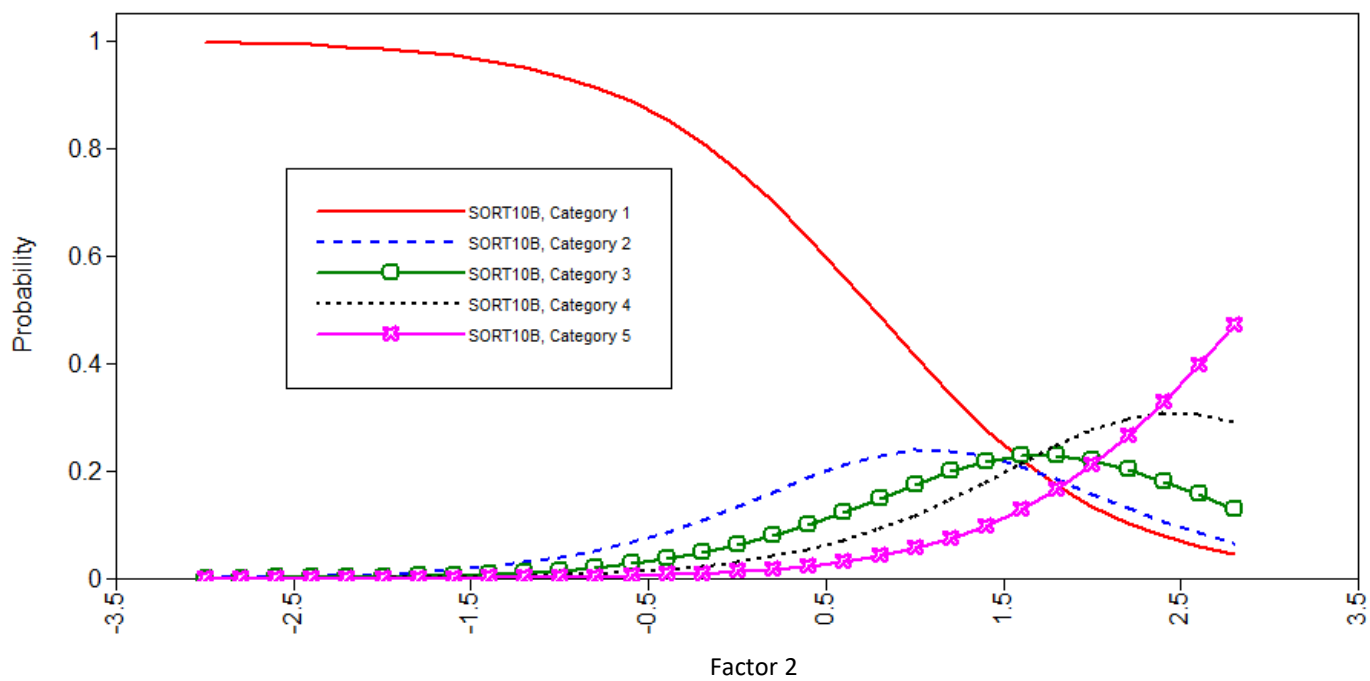

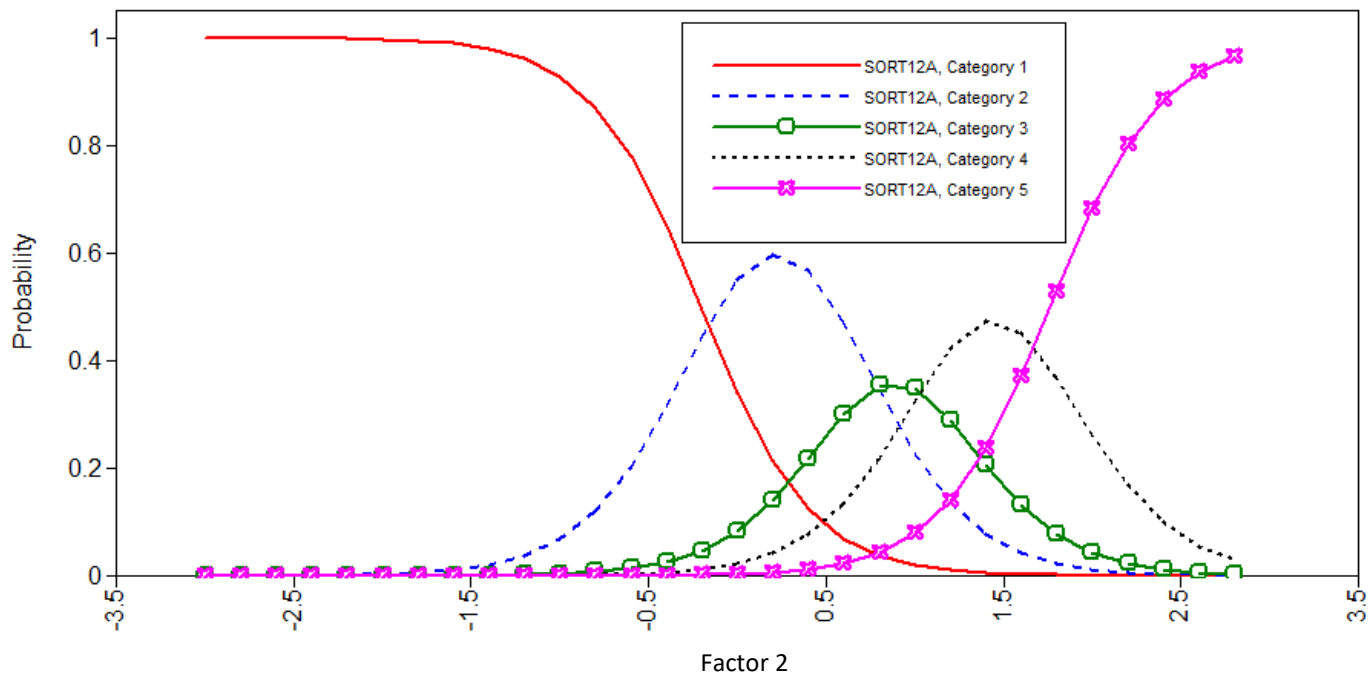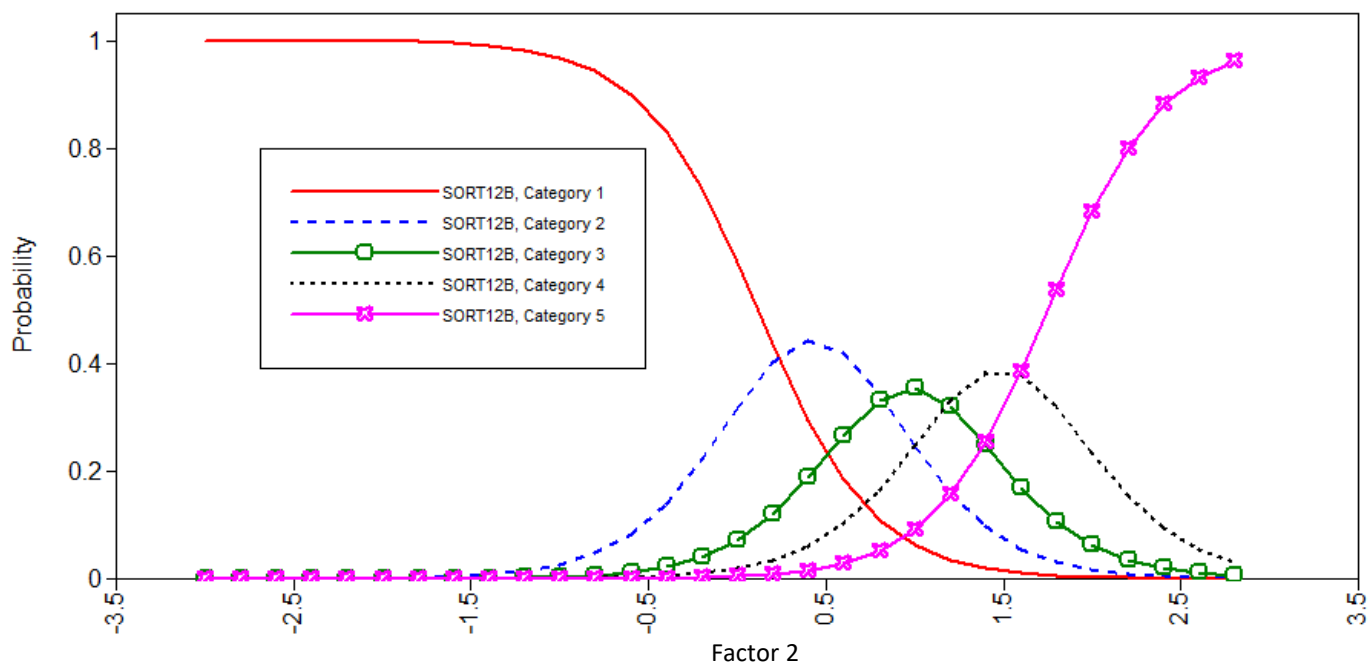

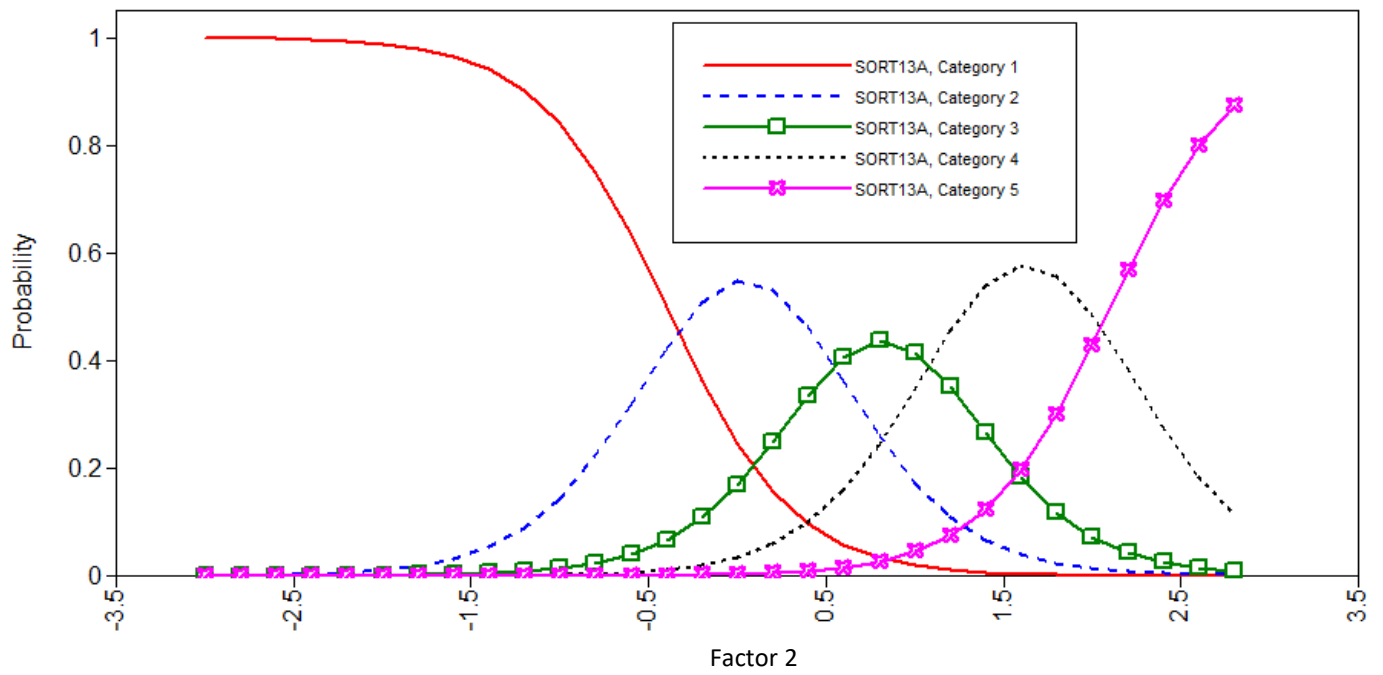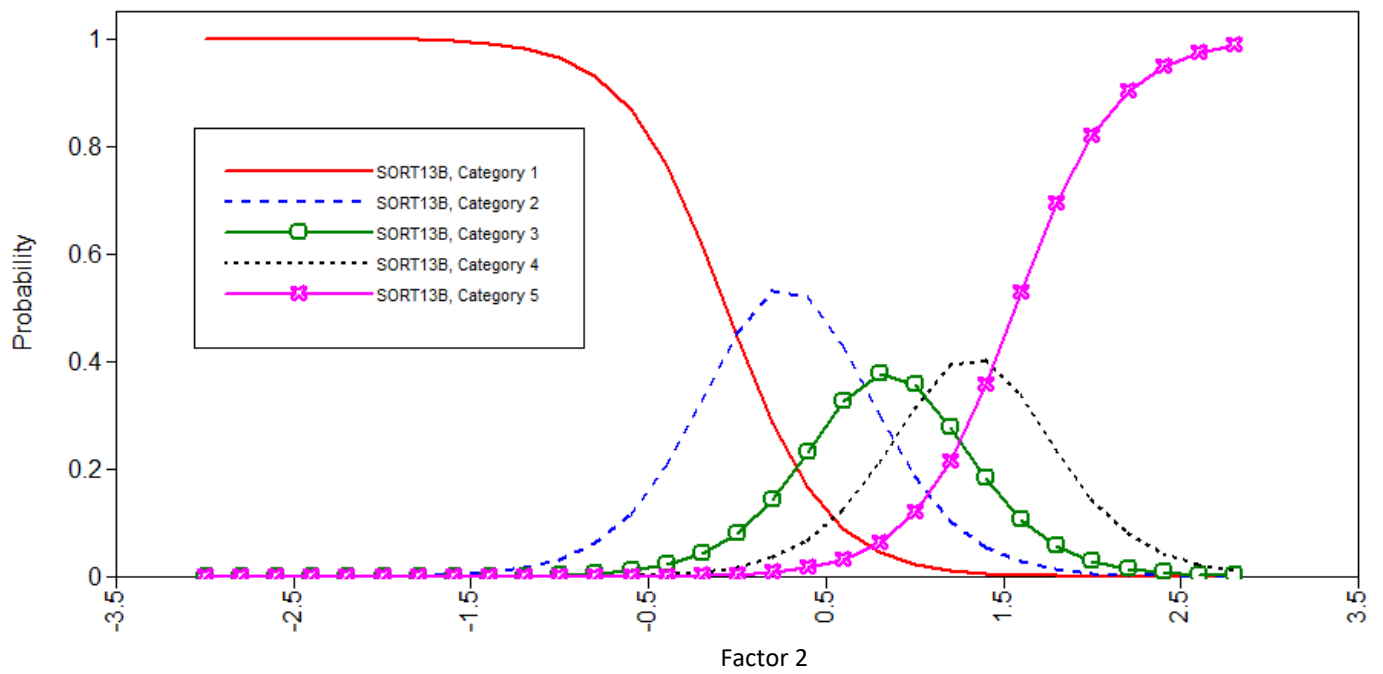

Figure S2. Item characteristic curves (ICCs) for individual items from the Significant Others' Responses to Trauma Scale (SORTS) loading onto Factor 2 (anxiety-related accommodation)

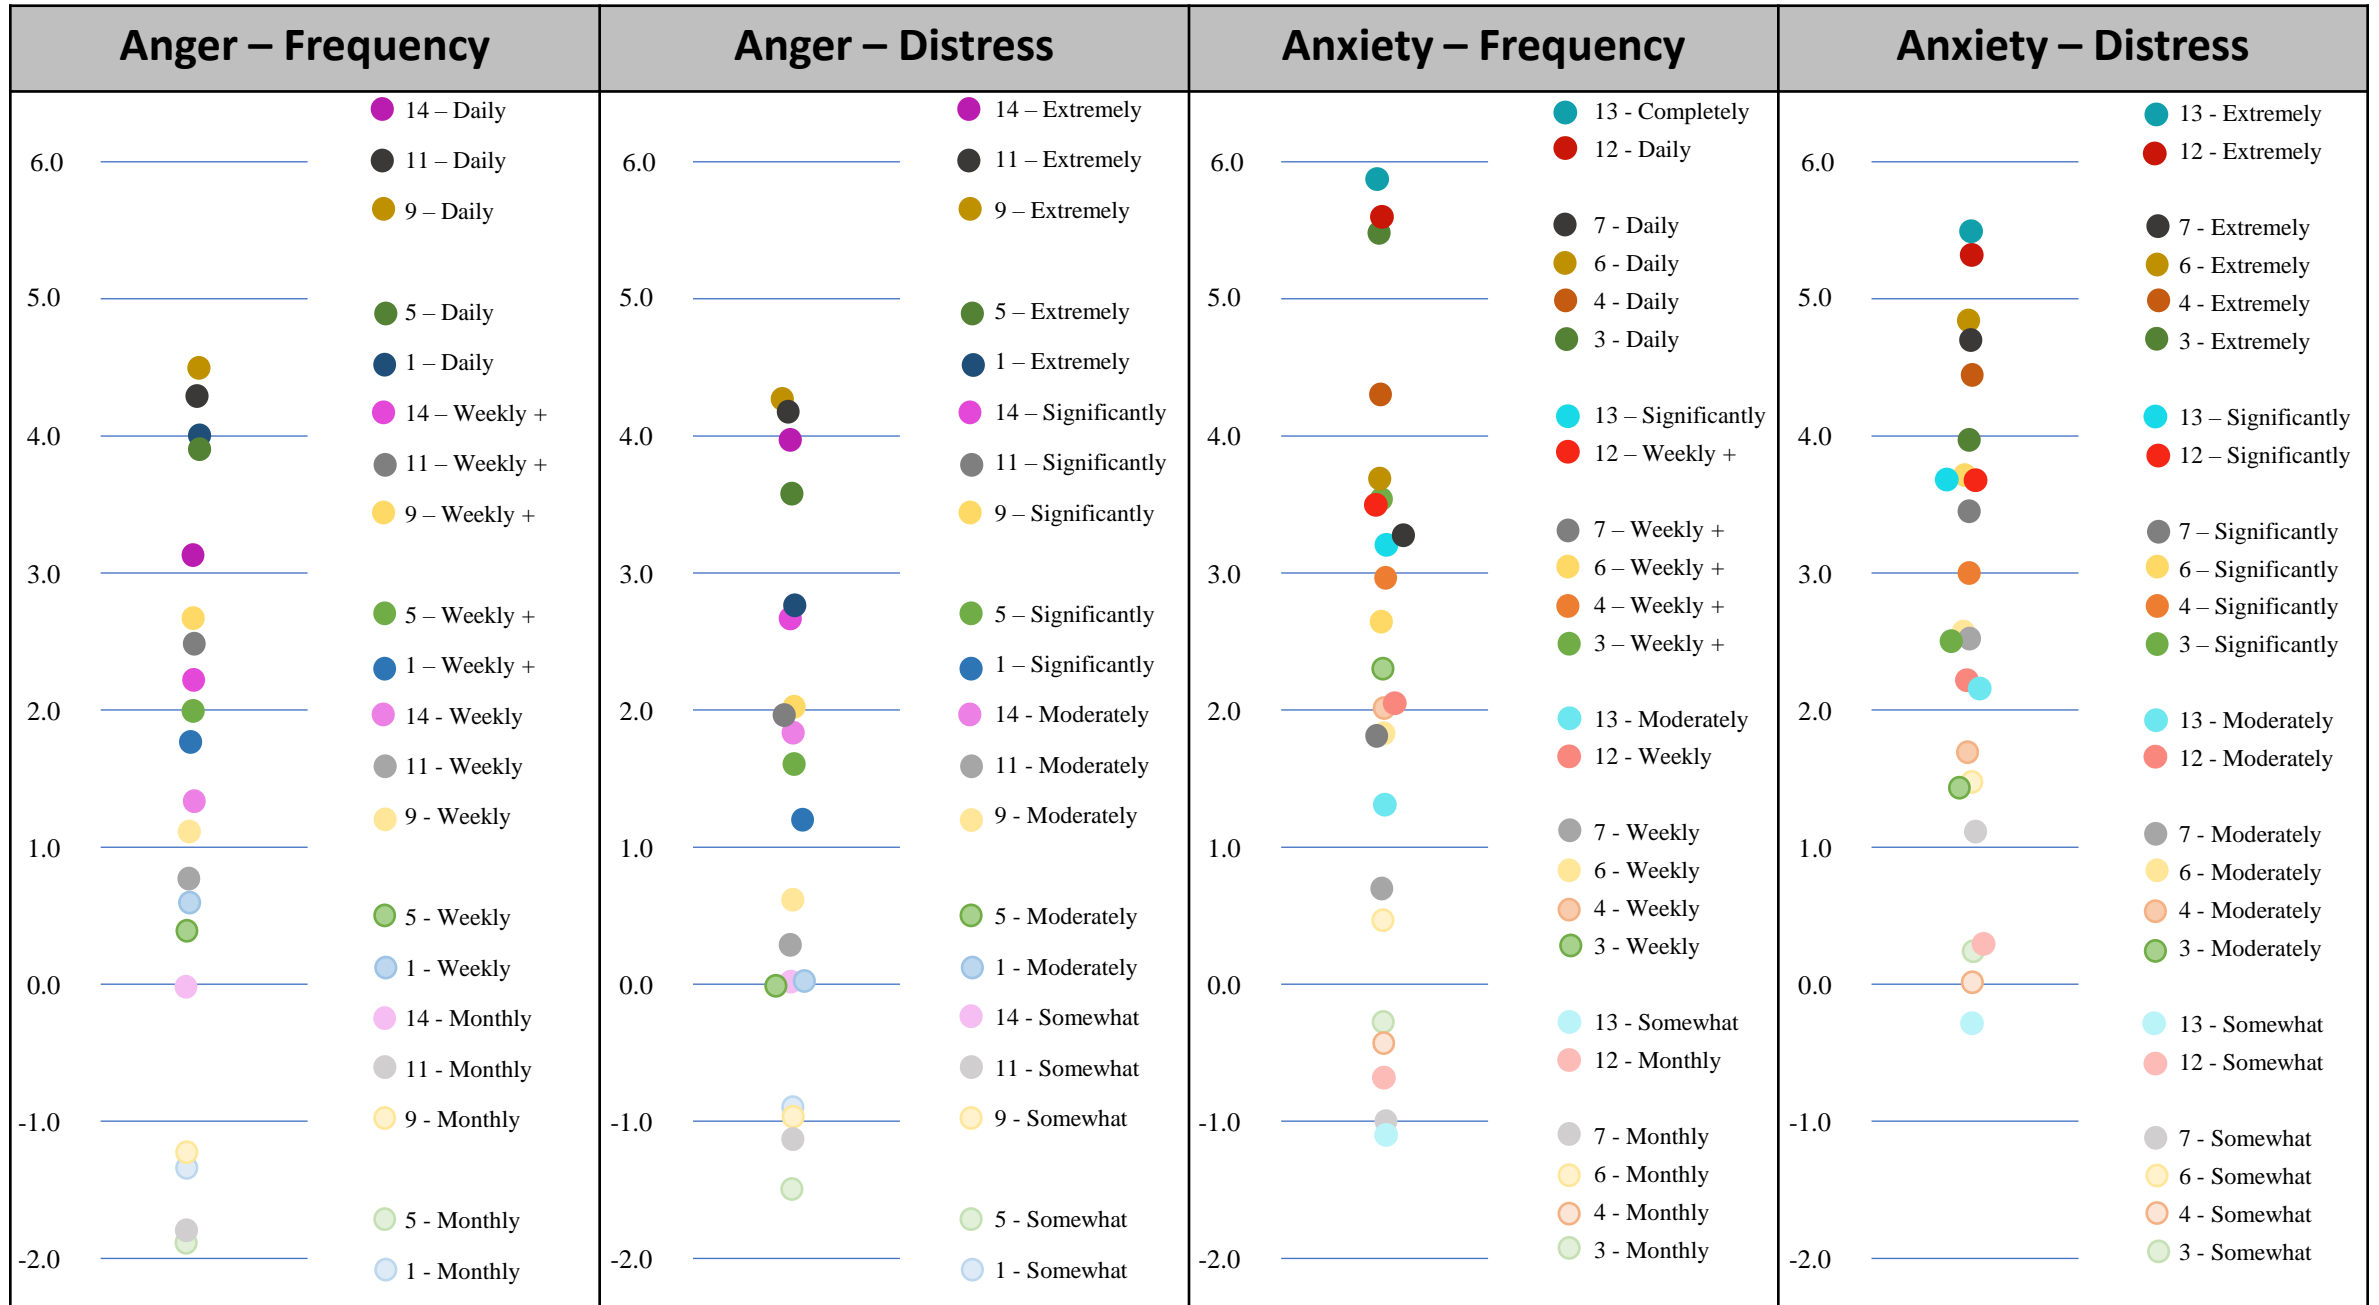

Figure S3. Item difficulties for Significant Others' Responses to Trauma Scale
